# Supplementary material
Source: Springer Nature journal article supplement (https://www.springermedizin.de/resource/supplementary/12865_2004_64_MOESM3_ESM.pdf/9428478)

## A (Unfractionated B cells)

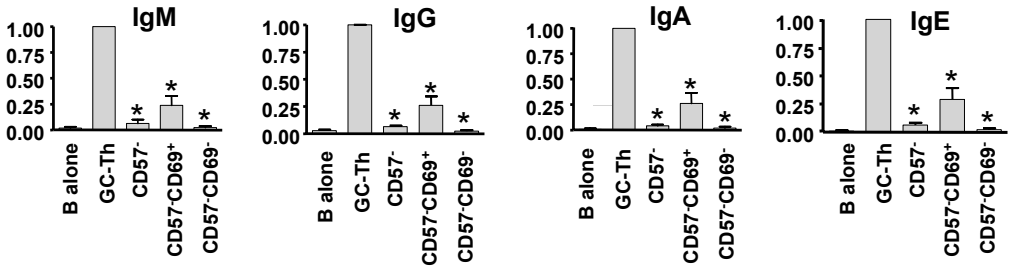

## B (Naïve B cells)

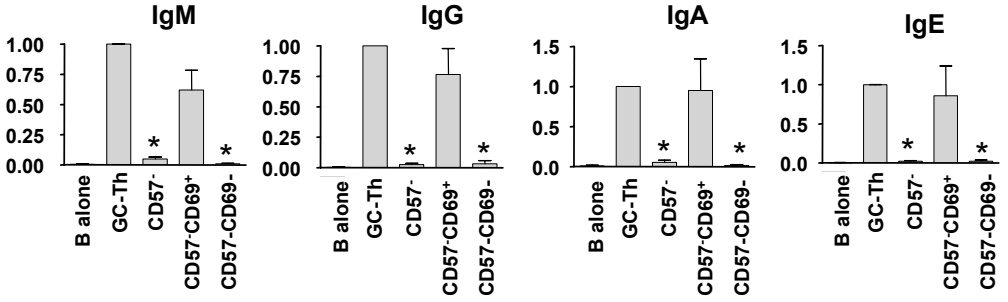

## C (GC-B cells)

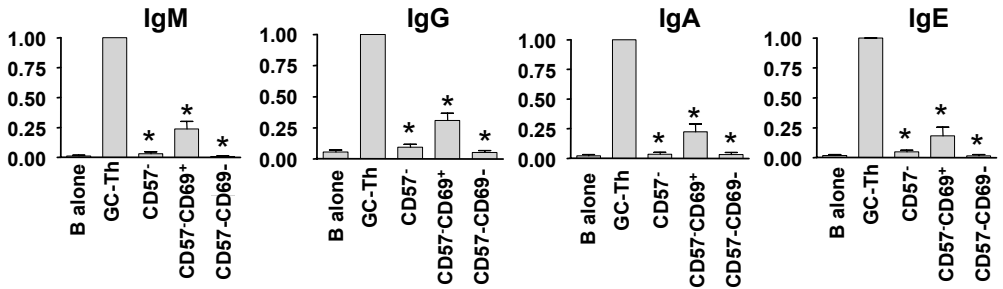

## D

### Naïve B + GC-Th

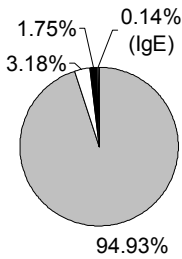

### Naïve B + CD57-CD69+ T

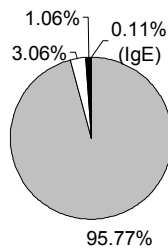

### GC-B + GC-Th

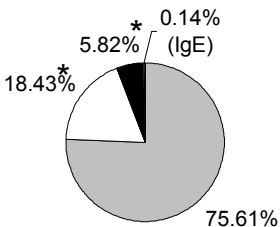

### GC-B + CD57-CD69+ T

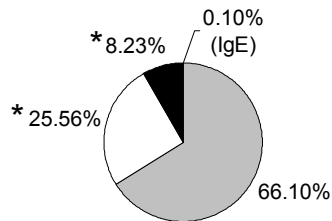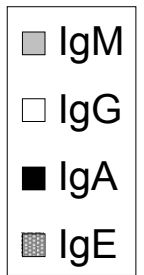

Supplement: MOESM3 [file 9428478]
